# Supplementary material for: LOC134466 methylation promotes oncogenesis of endometrial carcinoma through LOC134466/hsa-miR-196a-5p/TAC1 axis
Source: PubMed Central journal article supplement (PMC6286819; doi:10.18632/aging.101644), 2018-11-28
Supplement: aging-10-101644-s001.pdf [file aging-10-101644-s001.pdf]

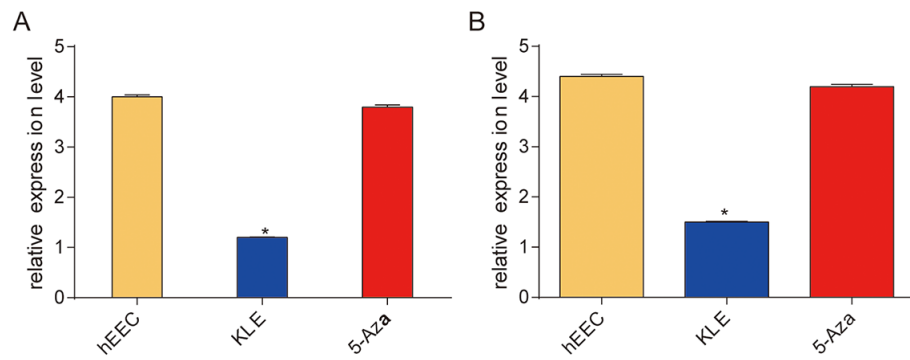

**Figure S1. 5-Aza treatment upregulated *LOC134466* and *HAC1* expression in EC.** (A): The relative expression of *LOC134466* in each group. (B) The relative expression of *TAC1* in each group. The gene expression was determined by qRT-PCR. \* $P < 0.05$ .
